# Supplementary material for: Mowing Did Not Alleviate the Negative Effect of Nitrogen Addition on the Arbuscular Mycorrhizal Fungal Community in a Temperate Meadow Grassland
Source: Front Plant Sci. 2022 Jun 9;13:917645. doi: 10.3389/fpls.2022.917645 (PMC9228033; doi:10.3389/fpls.2022.917645)
Supplement: Supplementary file 4 [file Data_Sheet_4.docx]

**Supplementary Information for**

**Mowing did not alleviate the negative effect of nitrogen addition on arbuscular mycorrhizal fungal community in a temperate meadow grassland**

***Siqi Qin* *1, 2, 3, Guojiao Yang 1, 4, Yang Zhang 1, 2, 3, Meixia Song 1, 2, 3, Lu Sun 1, 2, 3, Yangzhe Cui 1, 2, 3, Jibin Dong 1, 2, 3, Ning Wang 1, 2, 3, Xiao Liu 1, 2, 3, Peiming Zheng 1, 2, 3*, Renqing Wang 1, 2, 3***

*1 Institute of Ecology and Biodiversity, School of Life Sciences, Shandong University, 72 Binhai Road, Qingdao 266237, China*

*2 Shandong Provincial Engineering and Technology Research Center for Vegetation Ecology, Shandong University, 72 Binhai Road, Qingdao 266237, China*

*3 Qingdao Forest Ecology Research Station of National Forestry and Grassland Administration, 72 Binhai Road, Qingdao 266237, China*

*4 College of Ecology and Environment, Hainan University, Haikou, 570228, China*

***Correspondence:***Peiming Zheng*
[*zhengpeiming@email.sdu.edu.cn*](mailto:zhengpeiming@email.sdu.edu.cn)

**Supplementary contents:**

**Table. S1** The proportion of variance of AM fungal communities composition explained by the first and second principal components in principal component analysis (PCA).

**Table. S2** Results (F values) of two-way ANOVA for the effects of mowing (M), nitrogen addition (N) and their interactions on soil properties. *P < 0.05, ** P < 0.01, *** P < 0.001.

**Table. S3** Results (F values) of two-way ANOVA for the effects of mowing (M), nitrogen addition (N) and their interactions on plant community α diversity. *P < 0.05, ** P < 0.01, *** P < 0.001.

**Table. S4** Results (F values) of two-way ANOVA for the effects of mowing (M), nitrogen addition (N) and their interactions on α diversity of AM fungal community in roots and soil. *P < 0.05, ** P < 0.01, *** P < 0.001.

**Table. S5** Results (F values) of two-way ANOVA for the effects of mowing (M), nitrogen addition (N) and their interactions on NTI and NRI of the arbuscular mycorrhizal fungal community in roots and soil. *P < 0.05, ** P < 0.01, *** P < 0.001.

**Figure S1** A priori model of the effects of N enrichment and mowing on AM fungal community: (a) AM fungal community in root, (b) AM fungal community in soil.

**Figure S2** Linear regressions of the α-diversity of plant community versus soil pH (a) and inorganic N (b) in unmown treatments.

**Figure S3** Linear regressions of the α-diversity of plant community versus soil pH (a) and inorganic N (b) in mown treatments.

**Figure S4** Rarefaction curves for observed AM fungal OTUs in soil and roots among the different treatments.

**Table. S1** The proportion of variance of AM fungal communities composition explained by the first and second principal components in principal component analysis (PCA).

|  | PC1 | PC2 |
| --- | --- | --- |
| AM fungi in soil | 39.69% | 10.25% |
| AM fungi in root | 37% | 20.32% |

**Table. S2** Results (F values) of two-way ANOVA for the effects of mowing (M), nitrogen addition (N) and their interactions on soil properties. *P < 0.05, ** P < 0.01, *** P < 0.001.

|  | Soil moisture | pH | Total C | Total N | Total P | Available P | 1/NH+ 4-N | Log10(NO- 3-N) | 1/Inorganic N |
| --- | --- | --- | --- | --- | --- | --- | --- | --- | --- |
| M | 12.978*** | 0.198 | 0.006 | 0.247 | 0.014 | 0.140 | 0.311 | 0.140 | 0.058 |
| N | 0.780 | 63.447*** | 0.579 | 10.196*** | 1.647 | 1.849 | 15.571*** | 5.922*** | 11.530*** |
| M×N | 0.763 | 2.797* | 0.395 | 0.774 | 1.300 | 0.842 | 1.004 | 1.181 | 1.391 |

**Table. S3** Results (F values) of two-way ANOVA for the effects of mowing (M), nitrogen addition (N) and their interactions on plant community α diversity. *P < 0.05, ** P < 0.01, *** P < 0.001.

|  | Richness | Shannon-Wiener index | Simpson index | Pielou index |
| --- | --- | --- | --- | --- |
| M | 30.534*** | 35.643*** | 40.180*** | 37.421*** |
| N | 11.152*** | 13.823*** | 13.028*** | 14.077*** |
| M×N | 1.777 | 0.173 | 0.243 | 0.159 |

**Table. S4** Results (F values) of two-way ANOVA for the effects of mowing (M), nitrogen addition (N) and their interactions on α diversity of AM fungal community in roots and soil. *P < 0.05, ** P < 0.01, *** P < 0.001.

|  | OUT richness | | Shannon-Wiener index | | Simpson index | | Pielou index | |
| --- | --- | --- | --- | --- | --- | --- | --- | --- |
|  | Root | Soil | Root | Soil | Root | Soil | Root | Soil |
| M | 2.308 | 0.085 | 0.030 | 0.206 | 0.327 | 0.941 | 0.493 | 0.106 |
| N | 2.095* | 1.038 | 3.128* | 2.465 | 2.215 | 4.722** | 1.990 | 3.720* |
| M×N | 1.253 | 0.771 | 0.542 | 0.451 | 0.807 | 0.072 | 1.226 | 0.410 |

**Table. S5** Results (F values) of two-way ANOVA for the effects of mowing (M), nitrogen addition (N) and their interactions on NTI and NRI of the arbuscular mycorrhizal fungal community in roots and soil. *P < 0.05, ** P < 0.01, *** P < 0.001.

|  | Root | | Soil | |
| --- | --- | --- | --- | --- |
|  | NTI | NRI | NTI | Log10(NRI) |
| M | 0.712 | 1.031 | 1.836 | 0.490 |
| N | 0.628 | 1.193 | 4.807** | 5.744*** |
| M×N | 0.954 | 1.384 | 0.302 | 0.214 |


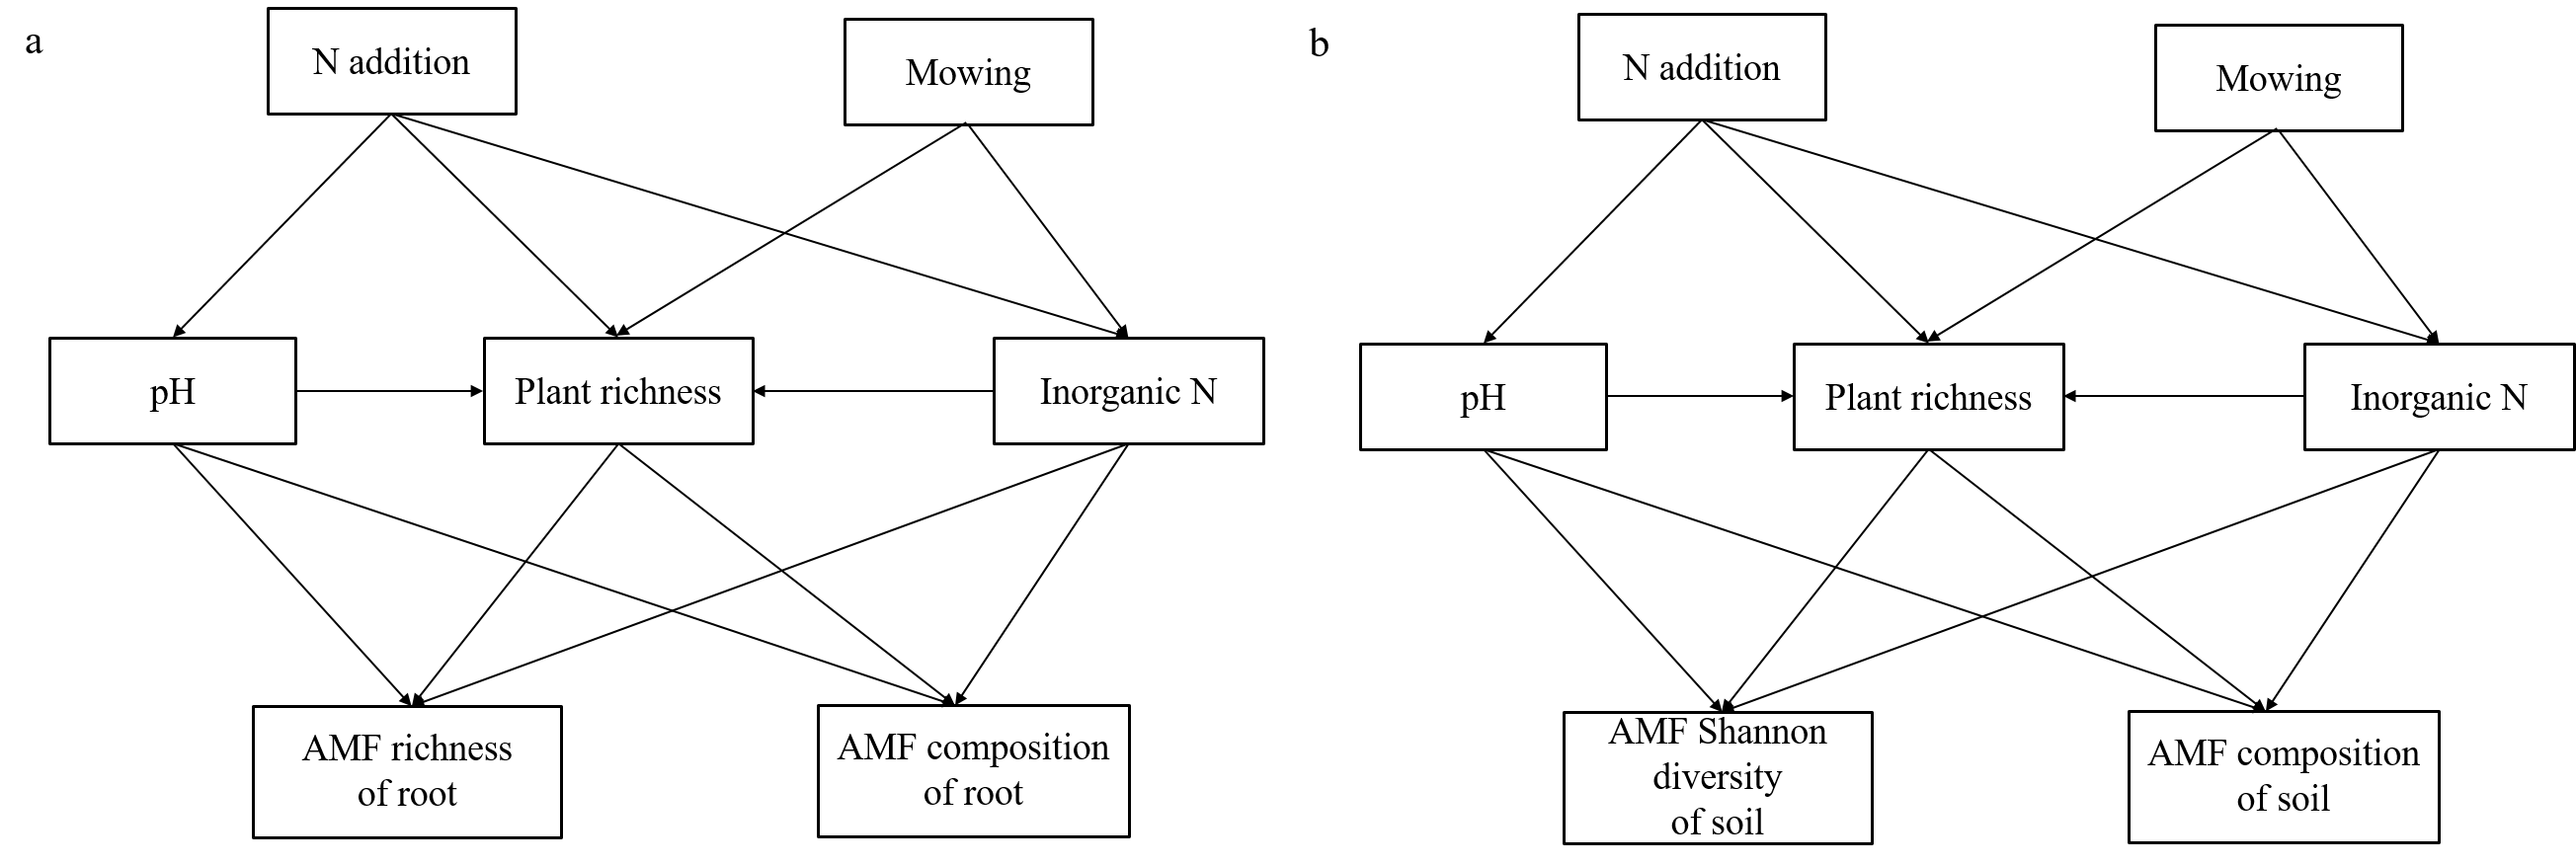


**Figure S1** A priori model of the effects of N enrichment and mowing on AM fungal community: (a) AM fungal community in root, (b) AM fungal community in soil.


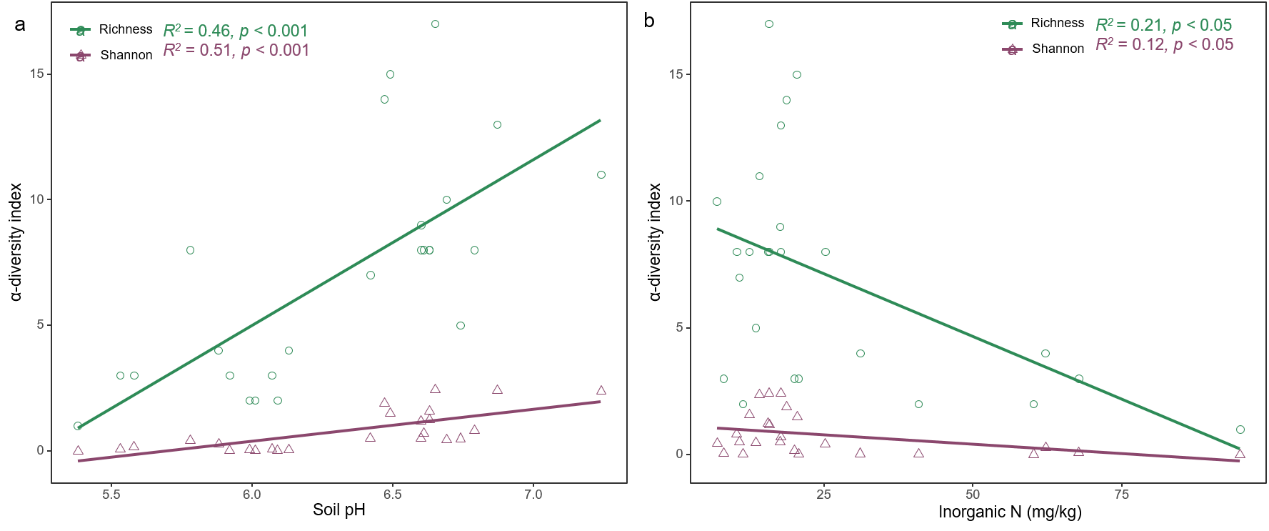


**Figure S2** Linear regressions of the α-diversity of plant community versus soil pH (a) and inorganic N (b) in unmown treatments.

**
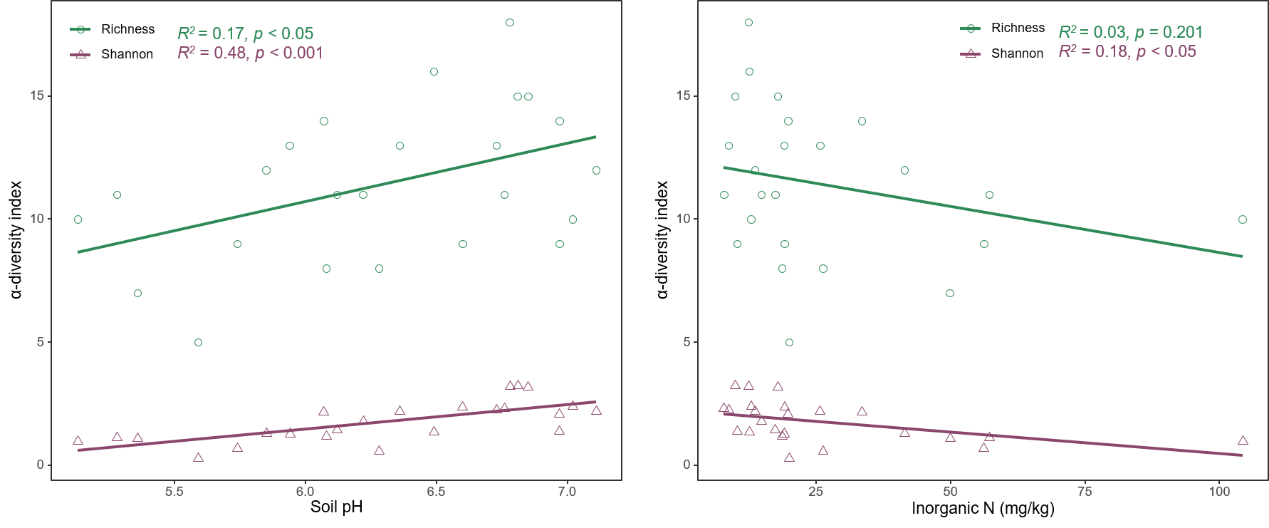
**

**Figure S3** Linear regressions of the α-diversity of plant community versus soil pH (a) and inorganic N (b) in mown treatments.


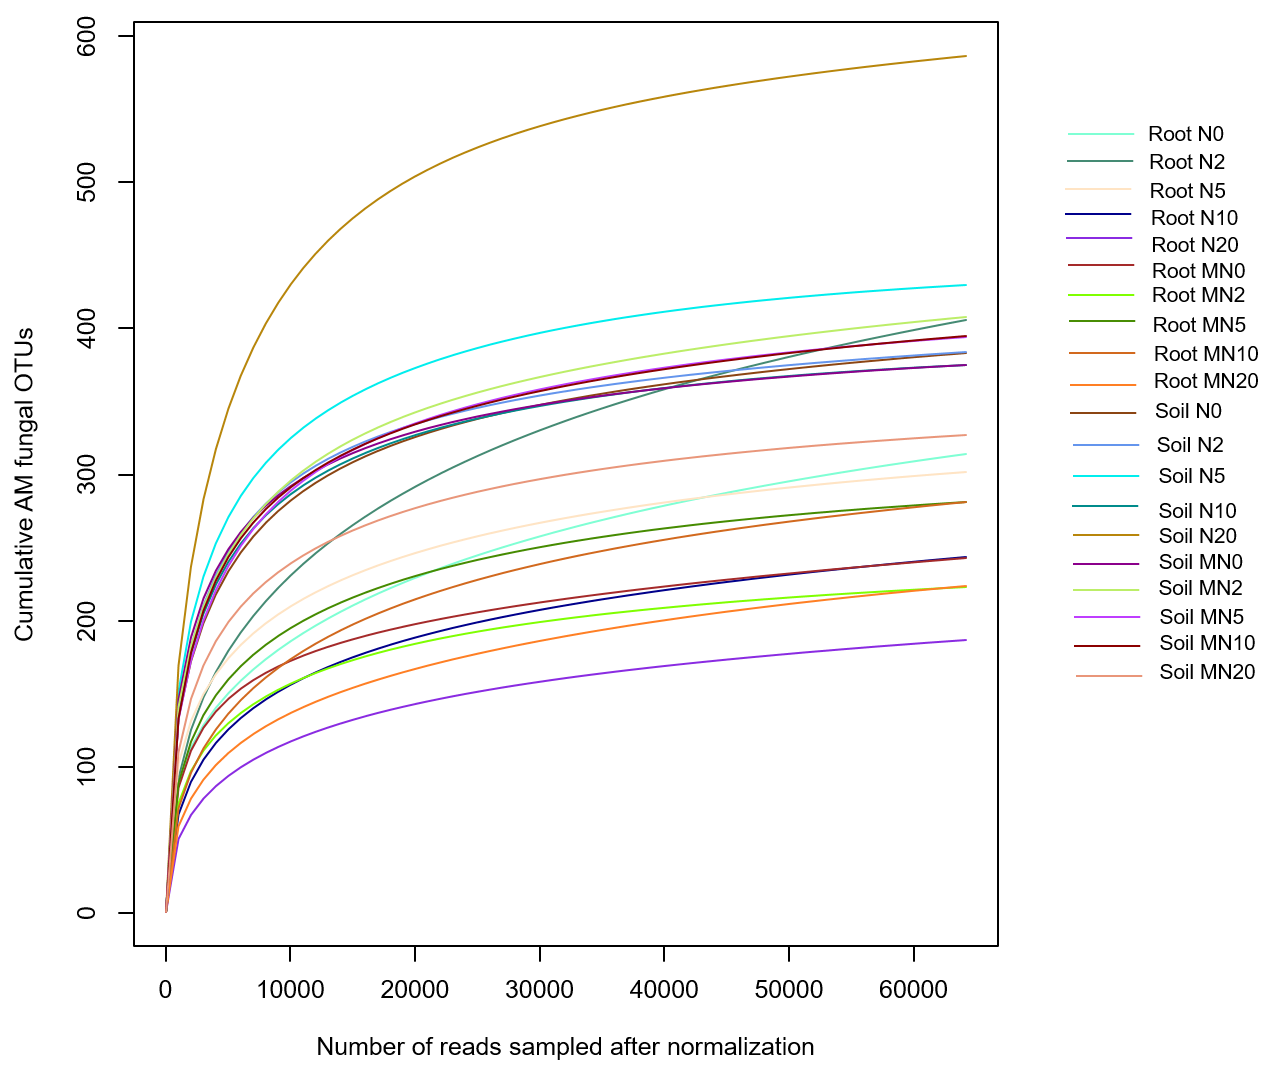


**Figure S4** Rarefaction curves for observed AM fungal OTUs in soil and roots among the different treatments.
